# Supplementary material for: Ablative radiotherapy improves survival but does not cure autochthonous mouse models of prostate and colorectal cancer
Source: PubMed Central journal article supplement (PMC10412558; doi:10.1038/s43856-023-00336-3), 2023-08-09
Supplement: 43856_2023_336_MOESM5_ESM.pdf [file 43856_2023_336_MOESM5_ESM.pdf]

## Description of Additional Supplementary Files

**File Name:** Supplementary Data 1

**Description:** Source data

**File Name:** Supplementary Video 1

**Description:** This 24 second movie shows an approximately 5-minute fluoroscopic image time-lapse (12X speed) of a mouse in the restrainer imaged by  $\mu$ CT. IV contrast was used to aid in visualization of kidneys and bladder
